# Supplementary material for: Effects of Fermented Herbal Tea Residue on Serum Indices and Fecal Microorganisms of Chuanzhong Black Goats
Source: MDPI journal article supplement (doi:10.3390/microorganisms10061228), 2022-06-16
Supplement: s1 [file s1]

**Table S1.** Beneficial substances in herbal tea.

| Beneficial substances    | Periodicals                            | References                                                                                                             |
|--------------------------|----------------------------------------|------------------------------------------------------------------------------------------------------------------------|
| alkaloids                | Agricultural Sciences In China         | Utilization of Chinese herbal feed additives in animal production                                                      |
| apigenin                 | Current Research in Food Science       | Changes in polysaccharides structure and bioactivity during <i>Mesona chinensis</i> Benth storage                      |
| aliphatic acids          | Phytochemistry Letters                 | New iridoids from the flowers of <i>Plumeria rubra</i> "Acutifolia"                                                    |
| carbohydrate             | Agricultural Sciences In China         | Utilization of Chinese herbal feed additives in animal production                                                      |
| campesterol              | Current Research in Food Science       | Changes in polysaccharides structure and bioactivity during <i>Mesona chinensis</i> Benth storage                      |
| fiber                    | Agricultural Sciences In China         | Utilization of Chinese herbal feed additives in animal production                                                      |
| flavonoid                | Current Research in Food Science       | Changes in polysaccharides structure and bioactivity during <i>Mesona chinensis</i> Benth storage                      |
| iridoids                 | Phytochemistry Letters                 | New iridoids from the flowers of <i>Plumeria rubra</i> "Acutifolia"                                                    |
| lignans                  | Phytochemistry Letters                 | New iridoids from the flowers of <i>Plumeria rubra</i> "Acutifolia"                                                    |
| mineral                  | Agricultural Sciences In China         | Utilization of Chinese herbal feed additives in animal production                                                      |
| monoterpenes             | Journal of Food Science and Technology | Hemical composition and antimicrobial activities of volatile oil extracted from <i>Chrysanthemum morifolium</i> Ramat. |
| organic acids            | Agricultural Sciences In China         | Utilization of Chinese herbal feed additives in animal production                                                      |
| protein                  | Agricultural Sciences In China         | Utilization of Chinese herbal feed additives in animal production                                                      |
| phenols                  | Agricultural Sciences In China         | Utilization of Chinese herbal feed additives in animal production                                                      |
| polysaccharides          | Agricultural Sciences In China         | Utilization of Chinese herbal feed additives in animal production                                                      |
| saponins                 | Current Research in Food Science       | Changes in polysaccharides structure and bioactivity during <i>Mesona chinensis</i> Benth storage                      |
| sesquiterpenes compounds | Journal of Food Science and Technology | Hemical composition and antimicrobial activities of volatile oil extracted from <i>Chrysanthemum morifolium</i> Ramat. |
| tannins                  | Agricultural Sciences In China         | Utilization of Chinese herbal feed additives in animal production                                                      |
| vitamins                 | Agricultural Sciences In China         | Utilization of Chinese herbal feed additives in animal production                                                      |

**Table S2.** Primer amplification information.

| gene        | primer                                                                  | Tm   | product size |
|-------------|-------------------------------------------------------------------------|------|--------------|
| 16sRNAV1-V9 | Forwar: 5'-AGAGTTTGATCCTGGCTCAG-3'<br>Reverse: 5'-GNTACCTTGTTACGACTT-3' | 55°C | 1466bp       |

**Table S3.** PCR amplification information.

| Number of Cycles | Temperature | Time     |
|------------------|-------------|----------|
| 1 cycle          | 95°C        | 2 min    |
| 30-35 cycles     | 95°C        | 20 sec   |
|                  | Tm-5°C      | 20 sec   |
|                  | 72°C        | 4 kb/min |
| 1 cycle          | 72°C        | 5 min    |

**Table S4.** PCR system and conditions

| Component                           | Volume   | Final       |
|-------------------------------------|----------|-------------|
| Template                            | Variable | as required |
| Forward Primer (10 µM)              | 1 µl     | 0.2 µM      |
| Reverse Primer (10 µM)              | 1 µl     | 0.2 µM      |
| 5×TransStar® FastPfu Buffer         | 10 µl    | 1×          |
| 2.5 mM dNTPs                        | 4 µl     | 0.2 mM      |
| 5×TransStar® FastPfu DNA Polymerase | 1 µl     | 2.5 units   |
| Nuclease-free Water                 | Variable | -           |
| Total volume                        | 50 µl    | -           |

**Table S5.** Effects of different proportion of FHTR on serum biochemical indices of Chuanzhong black goats.

| Items           | Treatment         |                    |                   | SEM   | <i>p</i> -value <sup>a</sup><br>Diet* Time | <i>p</i> -value <sup>b</sup> |       |
|-----------------|-------------------|--------------------|-------------------|-------|--------------------------------------------|------------------------------|-------|
|                 | CON               | L15                | L30               |       |                                            | line                         | quad  |
| ALB, (g/L)      |                   |                    |                   |       |                                            |                              |       |
| 0d              | 22.02             | 22.94              | 21.78             | 0.762 |                                            | 0.906                        | 0.556 |
| 17d             | 21.48             | 22.14              | 22.00             | 0.724 | 0.217                                      | 0.790                        | 0.813 |
| 35d             | 21.42             | 22.20              | 24.76             | 0.879 |                                            | 0.137                        | 0.633 |
| TP, (g/L)       |                   |                    |                   |       |                                            |                              |       |
| 0d              | 65.78             | 64.84              | 63.24             | 1.388 |                                            | 0.494                        | 0.917 |
| 17d             | 64.28             | 65.04              | 68.20             | 1.934 | 0.921                                      | 0.446                        | 0.785 |
| 35d             | 67.08             | 66.52              | 71.94             | 1.795 |                                            | 0.294                        | 0.450 |
| GLOB, (g/L)     |                   |                    |                   |       |                                            |                              |       |
| 0d              | 43.76             | 41.90              | 41.46             | 1.323 |                                            | 0.515                        | 0.815 |
| 17d             | 42.80             | 42.90              | 46.20             | 1.943 | 0.910                                      | 0.511                        | 0.719 |
| 35d             | 45.66             | 44.32              | 47.18             | 1.633 |                                            | 0.726                        | 0.578 |
| TC, (mmol/L)    |                   |                    |                   |       |                                            |                              |       |
| 0d              | 1.55              | 1.62               | 1.65              | 0.090 |                                            | 0.693                        | 0.932 |
| 17d             | 1.78              | 1.95               | 1.73              | 0.092 | 0.733                                      | 0.835                        | 0.357 |
| 35d             | 1.55              | 1.55               | 1.44              | 0.088 |                                            | 0.646                        | 0.775 |
| UREA, (mmol/L)  |                   |                    |                   |       |                                            |                              |       |
| 0d              | 6.12              | 4.99               | 4.71              | 0.393 |                                            | 0.159                        | 0.616 |
| 17d             | 4.69              | 5.96               | 5.49              | 0.239 | 0.410                                      | 0.144                        | 0.074 |
| 35d             | 5.39 <sup>a</sup> | 6.51 <sup>ab</sup> | 7.89 <sup>b</sup> | 0.491 |                                            | 0.038                        | 0.894 |
| NEFA, (mmol/L)  |                   |                    |                   |       |                                            |                              |       |
| 0d              | 0.08              | 0.07               | 0.09              | 0.004 |                                            | 0.334                        | 0.107 |
| 17d             | 0.09              | 0.08               | 0.08              | 0.005 | 0.079                                      | 0.262                        | 0.776 |
| 35d             | 0.06              | 0.06               | 0.08              | 0.006 |                                            | 0.341                        | 0.488 |
| HDL-C, (mmol/L) |                   |                    |                   |       |                                            |                              |       |
| 0d              | 0.92              | 0.95               | 0.96              | 0.027 |                                            | 0.659                        | 0.848 |
| 17d             | 1.04              | 1.14               | 1.05              | 0.039 | 0.568                                      | 0.984                        | 0.311 |
| 35d             | 0.98              | 0.98               | 0.92              | 0.036 |                                            | 0.528                        | 0.732 |
| LDL-C, (mmol/L) |                   |                    |                   |       |                                            |                              |       |
| 0d              | 0.48              | 0.50               | 0.50              | 0.038 |                                            | 0.890                        | 0.900 |
| 17d             | 0.49              | 0.50               | 0.48              | 0.039 | 0.501                                      | 0.925                        | 0.922 |
| 35d             | 0.42              | 0.39               | 0.48              | 0.041 |                                            | 0.575                        | 0.532 |
| AST, (U/L)      |                   |                    |                   |       |                                            |                              |       |
| 0d              | 79.68             | 84.88              | 85.24             | 4.250 |                                            | 0.625                        | 0.805 |
| 17d             | 99.18             | 105.50             | 82.36             | 6.273 | 0.921                                      | 0.287                        | 0.282 |
| 35d             | 88.30             | 103.76             | 78.34             | 5.803 |                                            | 0.473                        | 0.105 |

AST, Aspartate aminotransferase; HDL-C, High-density lipoprotein-cholesterol; TP, Total protein; ALB, Albumin; TC, Total cholesterol; UREA, Urea; GLOB, Globulin; TG, Triglyceride; LDL-C, Low-density lipoprotein-cholesterol; NEFA, Non-esterified fatty acid; SEM, standard error of mean. Means with different letters in the same row (a–c) differ ( $p < 0.05$ ), and no letters or the same letters are not significantly different. CON, 0% FHTR in the diet, L15, 15% FHTR in the diet; L30, 30% FHTR in the diet. *p*-value<sup>a</sup>, interaction of feeding time and diet. *p*-value<sup>b</sup> represent *p*-values for linear and quadratic orthogonal contrasts for diet. \*, interaction analysis.

**Table S6.** Effects of different proportion of FHTR on oxidative stress indices of Chuanzhong black goats.

| Items          | Treatment           |                     |                     | SEM    | <i>p</i> -value <sup>a</sup> | <i>p</i> -value <sup>b</sup> |       |
|----------------|---------------------|---------------------|---------------------|--------|------------------------------|------------------------------|-------|
|                | CON                 | L15                 | L30                 |        | Diet* Time                   | line                         | quad  |
| MDA, (nmol/mL) |                     |                     |                     |        |                              |                              |       |
| 0d             | 21.71               | 20.18               | 20.77               | 0.646  |                              | 0.579                        | 0.474 |
| 17d            | 13.73               | 15.29               | 15.34               | 0.529  | 0.451                        | 0.239                        | 0.512 |
| 35d            | 15.34               | 14.74               | 14.22               | 0.669  |                              | 0.530                        | 0.980 |
| GSH-Px,(U/mL)  |                     |                     |                     |        |                              |                              |       |
| 0d             | 105.24              | 110.84              | 101.04              | 6.397  |                              | 0.945                        | 0.677 |
| 17d            | 131.57              | 126.95              | 133.18              | 6.975  | 0.523                        | 0.931                        | 0.739 |
| 35d            | 136.79 <sup>a</sup> | 132.24 <sup>a</sup> | 159.61 <sup>b</sup> | 5.062  |                              | 0.101                        | 0.048 |
| T-AOC, (U/mL)  |                     |                     |                     |        |                              |                              |       |
| 0d             | 0.39                | 0.35                | 0.35                | 0.022  |                              | 0.492                        | 0.719 |
| 17d            | 0.41                | 0.42                | 0.45                | 0.021  | 0.506                        | 0.400                        | 0.847 |
| 35d            | 0.57                | 0.49                | 0.52                | 0.025  |                              | 0.425                        | 0.342 |
| OH-, (U/mL)    |                     |                     |                     |        |                              |                              |       |
| 0d             | 711.64              | 745.18              | 715.35              | 18.718 |                              | 0.940                        | 0.464 |
| 17d            | 636.13              | 599.93              | 613.03              | 18.650 | 0.245                        | 0.640                        | 0.566 |
| 35d            | 598.16 <sup>a</sup> | 625.25 <sup>a</sup> | 706.05 <sup>b</sup> | 17.838 |                              | 0.008                        | 0.384 |
| BHBA, (μmol/L) |                     |                     |                     |        |                              |                              |       |
| 0d             | 363.26              | 418.45              | 436.04              | 18.483 |                              | 0.122                        | 0.628 |
| 17d            | 383.17              | 407.62              | 385.70              | 10.589 | 0.863                        | 0.927                        | 0.340 |
| 35d            | 309.02              | 306.95              | 302.29              | 16.521 |                              | 0.880                        | 0.973 |

CRP, C reactive protein; BHBA, Beta-hydroxybutyric acid; OH-, Inhibition of hydroxyl radical; T-AOC, Total antioxidant capacity; MDA, Malonaldehyde; GSH-PX, Glutathione peroxidase. Means with different letters in the same row (a–c) differ ( $p < 0.05$ ), and no letters or the same letters are not significantly different. CON, 0% FHTR in the diet, L15, 15% FHTR in the diet; L30, 30% FHTR in the diet. *p*-value<sup>a</sup>, interaction of feeding time and diet. *p*-value<sup>b</sup> represent *p*-values for linear and quadratic orthogonal contrasts for diet.\*; interaction analysis.

**Table S7.** Effects of different proportion of FHTR on immune indices of Chuanzhong black goats.

| Items           | Treatment |         |         | SEM    | <i>p</i> - value <sup>a</sup> |       | <i>p</i> - value <sup>b</sup> |  |
|-----------------|-----------|---------|---------|--------|-------------------------------|-------|-------------------------------|--|
|                 | CON       | L15     | L30     |        | Diet* Time                    | line  | quad                          |  |
| IgM, (μg/mL)    |           |         |         |        |                               |       |                               |  |
| 0d              | 2090.14   | 1969.08 | 2108.00 | 78.346 | 0.186                         | 0.930 | 0.473                         |  |
| 17d             | 2215.60   | 2166.52 | 1953.21 | 69.144 |                               | 0.136 | 0.574                         |  |
| 35d             | 2268.26   | 2316.12 | 2501.78 | 93.546 |                               | 0.344 | 0.743                         |  |
| IgG, (mg/mL)    |           |         |         |        |                               |       |                               |  |
| 0d              | 4.98      | 6.21    | 5.18    | 0.328  | 0.761                         | 0.806 | 0.120                         |  |
| 17d             | 6.19      | 6.18    | 5.96    | 0.331  |                               | 0.792 | 0.895                         |  |
| 35d             | 7.87      | 7.74    | 6.98    | 0.323  |                               | 0.290 | 0.661                         |  |
| IgA, (μg/mL)    |           |         |         |        |                               |       |                               |  |
| 0d              | 273.05    | 274.46  | 296.86  | 8.573  | 0.967                         | 0.286 | 0.580                         |  |
| 17d             | 323.50    | 306.10  | 325.94  | 13.505 |                               | 0.946 | 0.553                         |  |
| 35d             | 381.31    | 362.90  | 393.68  | 9.356  |                               | 0.602 | 0.242                         |  |
| IL-2, (pg/mL)   |           |         |         |        |                               |       |                               |  |
| 0d              | 685.47    | 708.37  | 765.85  | 50.182 | 0.672                         | 0.550 | 0.881                         |  |
| 17d             | 834.81    | 833.91  | 763.09  | 38.908 |                               | 0.488 | 0.694                         |  |
| 35d             | 1082.51   | 926.43  | 974.83  | 48.627 |                               | 0.388 | 0.345                         |  |
| TNF-α, (pmol/L) |           |         |         |        |                               |       |                               |  |
| 0d              | 4.62      | 6.65    | 4.80    | 0.703  | 0.972                         | 0.919 | 0.222                         |  |
| 17d             | 5.88      | 5.43    | 5.72    | 0.680  |                               | 0.929 | 0.815                         |  |
| 35d             | 3.66      | 3.79    | 3.97    | 0.549  |                               | 0.834 | 0.986                         |  |

TNF-α, Tumor necrosis factor-alpha; IL-2, Interleukin-2; IgA, Immunoglobulin A; IgM, Immunoglobulin M (IgM); IgG, Immunoglobulin G. Means with different letters in the same row (a-c) differ ( $p < 0.05$ ), and no letters or the same letters are not significantly different. CON, 0% FHTR in the diet, L15, 15% FHTR in the diet; L30, 30% FHTR in the diet.  $p$ -value<sup>a</sup>, interaction of feeding time and diet.  $p$ -value<sup>b</sup> represent  $p$ -values for linear and quadratic orthogonal contrasts for diet. \*, interaction analysis.

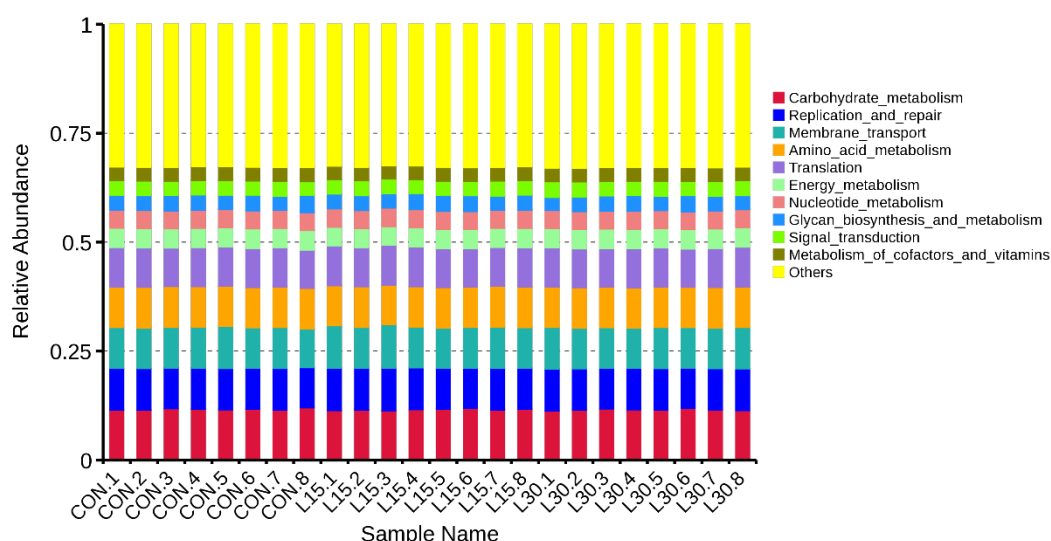

**Figure S1.** The top 10 predicted functions of level 2 of the fecal microorganism analyzed via Tax4fun. CON, 0% fermented herbal tea residue silage (FHTR) in the diet, L15, 15% (FHTR) in the diet; L30, 30% (FHTR) in the diet.
